# Supplementary material
Source: PubMed Central journal article supplement (PMC9283190)
Supplement: 125_2022_5713_MOESM1_ESM.pdf [file 125_2022_5713_MOESM1_ESM.pdf]

**Table 1. The Pearson correlation between per capita GDP and attributable burden of risk factors in 203 countries in 2019**

| <b>Variable</b>       | <b>PAF</b>                               | <b>r</b> | <b>P</b> |
|-----------------------|------------------------------------------|----------|----------|
| <b>Death</b>          |                                          |          |          |
| Metabolic factors     | High BMI                                 | -0.060   | 0.403    |
| Environmental factors | Ambient particulate matter pollution     | -0.042   | 0.564    |
|                       | Household air pollution from solid fuels | -0.472   | <0.0001  |
| Tobacco               | Smoking                                  | -0.358   | <0.0001  |
|                       | Second-hand smoke                        | 0.116    | 0.108    |
| Dietary               | Diet low in fruits                       | -0.296   | <0.0001  |
|                       | Diet low in whole grains                 | -0.042   | 0.562    |
|                       | Diet high in red meat                    | 0.577    | <0.0001  |
|                       | Diet high in processed meat              | 0.496    | <0.0001  |
|                       | Diet high in sugar-sweetened beverages   | 0.651    | <0.0001  |
|                       | Diet low in fiber                        | 0.130    | 0.071    |
|                       | Diet low in nuts and seeds               | 0.020    | 0.777    |
| Physical activity     | Low physical activity                    | 0.454    | <0.0001  |
| <b>DALYs</b>          |                                          |          |          |
| Metabolic factors     | High BMI                                 | 0.075    | 0.300    |
| Environmental factors | Ambient particulate matter pollution     | -0.039   | 0.588    |
|                       | Household air pollution from solid fuels | -0.473   | <0.0001  |
| Tobacco               | Smoking                                  | -0.294   | <0.0001  |
|                       | Second-hand smoke                        | -0.277   | <0.0001  |
| Dietary               | Diet low in fruits                       | -0.296   | <0.0001  |
|                       | Diet low in whole grains                 | -0.035   | 0.629    |
|                       | Diet high in red meat                    | 0.594    | <0.0001  |
|                       | Diet high in processed meat              | 0.504    | <0.0001  |
|                       | Diet high in sugar-sweetened beverages   | 0.669    | <0.0001  |
|                       | Diet low in fiber                        | 0.107    | 0.137    |
|                       | Diet low in nuts and seeds               | -0.018   | 0.806    |
| Physical activity     | Low physical activity                    | 0.398    | <0.0001  |
